# Supplementary material for: An Overview of Systematic Reviews and Meta-Analyses on Acupuncture for Post-Acute Stroke Dysphagia
Source: MDPI journal article supplement (doi:10.3390/geriatrics4040068), 2019-12-08
Supplement: s1 [file s1]

Table 2: AMSTAR 2 Checklist

|                                                                                                                                                                                                                                                                                                                                 |                                                                                                                                                                                                                                                                                                                                                 |                                                                                                     |
|---------------------------------------------------------------------------------------------------------------------------------------------------------------------------------------------------------------------------------------------------------------------------------------------------------------------------------|-------------------------------------------------------------------------------------------------------------------------------------------------------------------------------------------------------------------------------------------------------------------------------------------------------------------------------------------------|-----------------------------------------------------------------------------------------------------|
| 1. Did the research questions and inclusion criteria for the review include the components of PICO?                                                                                                                                                                                                                             |                                                                                                                                                                                                                                                                                                                                                 |                                                                                                     |
| For Yes:<br><input type="checkbox"/> Population<br><input type="checkbox"/> Intervention<br><input type="checkbox"/> Comparator group<br><input type="checkbox"/> Outcome                                                                                                                                                       | Optional (recommended)<br><input type="checkbox"/> Timeframe for follow-up                                                                                                                                                                                                                                                                      | <input type="checkbox"/> Yes<br><input type="checkbox"/> No                                         |
| 2. Did the report of the review contain an explicit statement that the review methods were established prior to the conduct of the review and did the report justify any significant deviations from the protocol?                                                                                                              |                                                                                                                                                                                                                                                                                                                                                 |                                                                                                     |
| For Partial Yes: The authors state that they had a written protocol or guide that included ALL the following:<br><input type="checkbox"/> review question(s)<br><input type="checkbox"/> a search strategy<br><input type="checkbox"/> inclusion/exclusion criteria<br><input type="checkbox"/> a risk of bias (RoB) assessment | For Yes: As for partial yes, plus the protocol should be registered and should also have specified:<br><input type="checkbox"/> a meta-analysis/synthesis plan, if appropriate, and<br><input type="checkbox"/> a plan for investigating causes of heterogeneity<br><input type="checkbox"/> justification for any deviations from the protocol | <input type="checkbox"/> Yes<br><input type="checkbox"/> Partial Yes<br><input type="checkbox"/> No |
| 3. Did the review authors explain their selection of the study designs for inclusion in the review?                                                                                                                                                                                                                             |                                                                                                                                                                                                                                                                                                                                                 |                                                                                                     |
| For Yes, the review should satisfy ONE of the following:<br><input type="checkbox"/> Explanation for including only RCTs<br><input type="checkbox"/> OR Explanation for including only NRSI<br><input type="checkbox"/> OR Explanation for including both RCTs and NRSI                                                         |                                                                                                                                                                                                                                                                                                                                                 | <input type="checkbox"/> Yes<br><input type="checkbox"/> No                                         |
| 4. Did the review authors use a comprehensive literature search strategy?                                                                                                                                                                                                                                                       |                                                                                                                                                                                                                                                                                                                                                 |                                                                                                     |
| For Partial Yes (all the following):<br><input type="checkbox"/> searched at least 2 databases (relevant to research question)<br><input type="checkbox"/> provided key word and/or search strategy                                                                                                                             | For Yes, should also have (all the following):<br><input type="checkbox"/> searched the reference lists/bibliographies of included studies<br><input type="checkbox"/> searched trial/study registries                                                                                                                                          | <input type="checkbox"/> Yes<br><input type="checkbox"/> Partial Yes<br><input type="checkbox"/> No |

|                                                                                                                                                                                                                                                                                                                                                                                      |                                                                                                                                                                                                                                                                                         |                                                                                                     |
|--------------------------------------------------------------------------------------------------------------------------------------------------------------------------------------------------------------------------------------------------------------------------------------------------------------------------------------------------------------------------------------|-----------------------------------------------------------------------------------------------------------------------------------------------------------------------------------------------------------------------------------------------------------------------------------------|-----------------------------------------------------------------------------------------------------|
| <input type="checkbox"/> justified publication restrictions (e.g. language)                                                                                                                                                                                                                                                                                                          | <input type="checkbox"/> included/consulted content experts in the field<br><input type="checkbox"/> where relevant, searched for grey literature<br><input type="checkbox"/> conducted search within 24 months of completion of the review                                             |                                                                                                     |
| 5. Did the review authors perform study selection in duplicate?                                                                                                                                                                                                                                                                                                                      |                                                                                                                                                                                                                                                                                         |                                                                                                     |
| For Yes, either ONE of the following:<br><input type="checkbox"/> at least two reviewers independently agreed on selection of eligible studies and achieved consensus on which studies to include<br><input type="checkbox"/> OR two reviewers selected a sample of eligible studies and achieved good agreement (at least 80 percent), with the remainder selected by one reviewer. |                                                                                                                                                                                                                                                                                         | <input type="checkbox"/> Yes<br><input type="checkbox"/> No                                         |
| 6. Did the review authors perform data extraction in duplicate?                                                                                                                                                                                                                                                                                                                      |                                                                                                                                                                                                                                                                                         |                                                                                                     |
| For Yes, either ONE of the following:<br><input type="checkbox"/> at least two reviewers achieved consensus on which data to extract from included studies<br><input type="checkbox"/> OR two reviewers extracted data from a sample of eligible studies and achieved good agreement (at least 80 percent), with the remainder extracted by one reviewer.                            |                                                                                                                                                                                                                                                                                         | <input type="checkbox"/> Yes<br><input type="checkbox"/> No                                         |
| 7. Did the review authors provide a list of excluded studies and justify the exclusions?                                                                                                                                                                                                                                                                                             |                                                                                                                                                                                                                                                                                         |                                                                                                     |
| For Partial Yes:<br><input type="checkbox"/> provided a list of all potentially relevant studies that were read in full-text form but excluded from the review                                                                                                                                                                                                                       | For Yes, must also have:<br><input type="checkbox"/> Justified the exclusion from the review of each potentially relevant study                                                                                                                                                         | <input type="checkbox"/> Yes<br><input type="checkbox"/> Partial Yes<br><input type="checkbox"/> No |
| 8. Did the review authors describe the included studies in adequate detail?                                                                                                                                                                                                                                                                                                          |                                                                                                                                                                                                                                                                                         |                                                                                                     |
| For Partial Yes (ALL the following):<br><input type="checkbox"/> described populations <input type="checkbox"/> described interventions <input type="checkbox"/> described comparators <input type="checkbox"/> described outcomes<br><input type="checkbox"/> described research designs                                                                                            | For Yes, should also have ALL the following:<br><input type="checkbox"/> described population in detail<br><input type="checkbox"/> described intervention in detail (including doses where relevant)<br><input type="checkbox"/> described comparator in detail (including doses where | <input type="checkbox"/> Yes<br><input type="checkbox"/> Partial Yes<br><input type="checkbox"/> No |

|                                                                                                                                                                                                                                                                                                                                              |                                                                                                                                                                                                                                                            |                                                                                                                                                    |
|----------------------------------------------------------------------------------------------------------------------------------------------------------------------------------------------------------------------------------------------------------------------------------------------------------------------------------------------|------------------------------------------------------------------------------------------------------------------------------------------------------------------------------------------------------------------------------------------------------------|----------------------------------------------------------------------------------------------------------------------------------------------------|
|                                                                                                                                                                                                                                                                                                                                              | relevant)<br><input type="checkbox"/> described study's setting    timeframe for follow-up                                                                                                                                                                 |                                                                                                                                                    |
| 9. Did the review authors use a satisfactory technique for assessing the risk of bias (RoB) in individual studies that were included in the review?                                                                                                                                                                                          |                                                                                                                                                                                                                                                            |                                                                                                                                                    |
| <b>RCTs :</b><br>For Partial Yes, must have assessed RoB from<br><input type="checkbox"/> unconcealed allocation, and<br><input type="checkbox"/> lack of blinding of patients and assessors when assessing outcomes (unnecessary for objective outcomes such as all-cause mortality)                                                        | For Yes, must also have assessed RoB from:<br><input type="checkbox"/> allocation sequence that was not truly random, and<br><input type="checkbox"/> selection of the reported result from among multiple measurements or analyses of a specified outcome | <input type="checkbox"/> Yes<br><input type="checkbox"/> Partial Yes<br><input type="checkbox"/> No<br><input type="checkbox"/> Includes only NRSI |
| <b>NRSI :</b><br>For Partial Yes, must have assessed RoB:<br><input type="checkbox"/> from confounding, and<br><input type="checkbox"/> from selection bias                                                                                                                                                                                  | For Yes, must also have assessed RoB:<br><input type="checkbox"/> methods used to ascertain exposures and outcomes, and <input type="checkbox"/> selection of the reported result from among multiple measurements or analyses of a specified outcome      | <input type="checkbox"/> Yes<br><input type="checkbox"/> Partial Yes<br><input type="checkbox"/> No<br><input type="checkbox"/> Includes only RCTs |
| 10. Did the review authors report on the sources of funding for the studies included in the review?                                                                                                                                                                                                                                          |                                                                                                                                                                                                                                                            |                                                                                                                                                    |
| For Yes<br><input type="checkbox"/> Must have reported on the sources of funding for individual studies included in the review. Note: Reporting that the reviewers looked for this information but it was not reported by study authors also qualifies                                                                                       |                                                                                                                                                                                                                                                            | <input type="checkbox"/> Yes<br><input type="checkbox"/> No                                                                                        |
| 11. If meta-analysis was performed did the review authors use appropriate methods for statistical combination of results?                                                                                                                                                                                                                    |                                                                                                                                                                                                                                                            |                                                                                                                                                    |
| <b>RCTs</b><br>For Yes:<br><input type="checkbox"/> The authors justified combining the data in a meta-analysis<br><input type="checkbox"/> AND they used an appropriate weighted technique to combine study results and adjusted for heterogeneity if present.<br><input type="checkbox"/> AND investigated the causes of any heterogeneity |                                                                                                                                                                                                                                                            | <input type="checkbox"/> Yes<br><input type="checkbox"/> No<br><input type="checkbox"/> No meta-analysis conducted                                 |
| <b>NRSI</b><br>For Yes:                                                                                                                                                                                                                                                                                                                      |                                                                                                                                                                                                                                                            | <input type="checkbox"/> Yes<br><input type="checkbox"/> No                                                                                        |

|                                                                                                                                                                                                                                                                                                                                                                                                                                                                                                                                                                                                                         |                                                                                                                    |
|-------------------------------------------------------------------------------------------------------------------------------------------------------------------------------------------------------------------------------------------------------------------------------------------------------------------------------------------------------------------------------------------------------------------------------------------------------------------------------------------------------------------------------------------------------------------------------------------------------------------------|--------------------------------------------------------------------------------------------------------------------|
| <input type="checkbox"/> The authors justified combining the data in a meta-analysis <input type="checkbox"/> AND they used an appropriate weighted technique to combine study results, adjusting for heterogeneity if present<br><input type="checkbox"/> AND they statistically combined effect estimates from NRSI that were adjusted for confounding, rather than combining raw data, or justified combining raw data when adjusted effect estimates were not available<br><input type="checkbox"/> AND they reported separate summary estimates for RCTs and NRSI separately when both were included in the review | <input type="checkbox"/> No meta-analysis conducted                                                                |
| 12. If meta-analysis was performed, did the review authors assess the potential impact of RoB in individual studies on the results of the meta-analysis or other evidence synthesis?                                                                                                                                                                                                                                                                                                                                                                                                                                    |                                                                                                                    |
| For Yes:<br><input type="checkbox"/> included only low risk of bias RCTs<br><input type="checkbox"/> OR, if the pooled estimate was based on RCTs and/or NRSI at variable RoB, the authors performed analyses to investigate possible impact of RoB on summary estimates of effect.                                                                                                                                                                                                                                                                                                                                     | <input type="checkbox"/> Yes<br><input type="checkbox"/> No<br><input type="checkbox"/> No meta-analysis conducted |
| 13. Did the review authors account for RoB in individual studies when interpreting/ discussing the results of the review?                                                                                                                                                                                                                                                                                                                                                                                                                                                                                               |                                                                                                                    |
| For Yes:<br><input type="checkbox"/> included only low risk of bias RCTs<br><input type="checkbox"/> OR, if RCTs with moderate or high RoB, or NRSI were included the review provided a discussion of the likely impact of RoB on the results                                                                                                                                                                                                                                                                                                                                                                           | <input type="checkbox"/> Yes<br><input type="checkbox"/> No                                                        |
| 14. Did the review authors provide a satisfactory explanation for, and discussion of, any heterogeneity observed in the results of the review?                                                                                                                                                                                                                                                                                                                                                                                                                                                                          |                                                                                                                    |
| For Yes:<br><input type="checkbox"/> There was no significant heterogeneity in the results<br><input type="checkbox"/> OR if heterogeneity was present the authors performed an investigation of sources of any heterogeneity in the results and discussed the impact of this on the results of the review                                                                                                                                                                                                                                                                                                              | <input type="checkbox"/> Yes<br><input type="checkbox"/> No                                                        |
| 15. If they performed quantitative synthesis did the review authors carry out an adequate investigation of publication bias (small study bias) and discuss its likely impact on the results of the review?                                                                                                                                                                                                                                                                                                                                                                                                              |                                                                                                                    |
| For Yes:<br><input type="checkbox"/> performed graphical or statistical tests for publication bias and discussed the likelihood and magnitude of impact                                                                                                                                                                                                                                                                                                                                                                                                                                                                 | <input type="checkbox"/> Yes<br><input type="checkbox"/> No                                                        |

|                                                                                                                                                                                      |                                                             |
|--------------------------------------------------------------------------------------------------------------------------------------------------------------------------------------|-------------------------------------------------------------|
| of publication bias                                                                                                                                                                  | <input type="checkbox"/> No meta-analysis conducted         |
| 16. Did the review authors report any potential sources of conflict of interest, including any funding they received for conducting the review?                                      |                                                             |
| For Yes:<br><input type="checkbox"/> The authors reported no competing interests OR The authors described their funding sources and how they managed potential conflicts of interest | <input type="checkbox"/> Yes<br><input type="checkbox"/> No |

PICO: Population/Intervention /Comparator group/Outcome

RCT: Randomized controlled trial

NRSI: Non-randomized studies of the effects of interventions

Shea BJ, Reeves BC, Wells G, Thuku M, Hamel C, Moran J, Moher D, Tugwell P, Welch V, Kristjansson E, Henry DA. AMSTAR 2: a critical appraisal tool for systematic reviews that include randomized or non-randomized studies of healthcare interventions, or both. BMJ. 2017 Sep 21;358:j4008.

**Table 3: Methodological quality assessment by AMSTAR 2**

| SRs            | Item 1 | Item 2 | Item 3 | Item 4 | Item 5 | Item 6 | Item 7 | Item 8 | Item 9 | Item 10 | Item 11 | Item 12 | Item 13 | Item 14 | Item 15 | Item 16 | In Total of Yes | Overall quality |
|----------------|--------|--------|--------|--------|--------|--------|--------|--------|--------|---------|---------|---------|---------|---------|---------|---------|-----------------|-----------------|
| 1 Zhang Y 2017 | PY     | N      | N      | PY     | Y      | Y      | N      | PY     | Y      | N       | PY      | N       | Y       | Y       | Y       | Y       | 7(43.75%)       | Critically low  |
| 2 Meng D 2016  | PY     | N      | N      | PY     | N      | N      | N      | PY     | Y      | N       | PY      | N       | N       | N       | Y       | Y       | 3(18.75%)       | Critically low  |
| 3 Liao MX 2017 | Y      | N      | N      | PY     | N      | Y      | N      | PY     | N      | N       | PY      | N       | N       | N       | N       | Y       | 2(12.5)         | Critically low  |
| 4 Zhu Y 2012   | Y      | N      | N      | PY     | Y      | Y      | N      | PY     | Y      | N       | PY      | N       | N       | N       | Y       | N       | 4(25%)          | Critically low  |
| 5 Hu TJ        | PY     | N      | N      | PY     | N      | Y      | N      | PY     | Y      | N       | PY      | N       | Y       | Y       | Y       | N       | 5(31.25%)       | Critically      |

|      |         |    |   |   |    |   |   |   |    |   |   |    |   |   |   |   |   |           |                |
|------|---------|----|---|---|----|---|---|---|----|---|---|----|---|---|---|---|---|-----------|----------------|
| 2015 |         |    |   |   |    |   |   |   |    |   |   |    |   |   |   |   |   |           | low            |
| 6    | Chen J  | Y  | N | N | PY | Y | Y | N | PY | N | N | PY | N | N | N | Y | Y | 4(25%)    | Critically low |
| 2015 |         |    |   |   |    |   |   |   |    |   |   |    |   |   |   |   |   |           |                |
| 7    | He J    | Y  | N | N | PY | N | Y | N | PY | Y | N | PY | N | Y | N | Y | Y | 6(37.5%)  | Critically low |
| 2009 |         |    |   |   |    |   |   |   |    |   |   |    |   |   |   |   |   |           |                |
| 8    | Yuan ML | Y  | N | N | PY | N | N | N | PY | N | N | PY | N | N | Y | Y | Y | 4(25%)    | Critically low |
| 2011 |         |    |   |   |    |   |   |   |    |   |   |    |   |   |   |   |   |           |                |
| 9    | Tang Q  | Y  | N | N | PY | Y | Y | N | PY | N | N | PY | N | N | N | Y | Y | 5(31.25%) | Critically low |
| 2019 |         |    |   |   |    |   |   |   |    |   |   |    |   |   |   |   |   |           |                |
| 10   | Tang XR | Y  | N | N | PY | Y | Y | N | PY | Y | N | PY | N | Y | N | Y | Y | 7(43.75%) | Critically low |
| 2019 |         |    |   |   |    |   |   |   |    |   |   |    |   |   |   |   |   |           |                |
| 11   | Shi L   | PY | N | N | PY | Y | Y | N | PY | Y | N | PY | N | N | N | Y | Y | 5(31.25%) | Critically low |
| 2018 |         |    |   |   |    |   |   |   |    |   |   |    |   |   |   |   |   |           |                |
| 12   | Xu MH   | Y  | N | N | PY | N | N | N | PY | Y | N | PY | N | N | Y | N | N | 3(18.75%) | Critically low |
| 2017 |         |    |   |   |    |   |   |   |    |   |   |    |   |   |   |   |   |           |                |
| 13   | Li S    | Y  | N | N | PY | Y | Y | N | PY | Y | N | PY | N | Y | N | Y | Y | 7(43.75%) | Critically low |
| 2011 |         |    |   |   |    |   |   |   |    |   |   |    |   |   |   |   |   |           |                |
| 14   | Wang C  | Y  | N | N | PY | N | N | N | PY | Y | N | PY | N | N | N | Y | N | 3(18.75%) | Critically low |
| 2017 |         |    |   |   |    |   |   |   |    |   |   |    |   |   |   |   |   |           |                |
| 15   | Tian Y  | Y  | N | N | PY | Y | N | N | PY | N | N | PY | N | N | N | Y | Y | 4(25%)    | Critically low |
| 2014 |         |    |   |   |    |   |   |   |    |   |   |    |   |   |   |   |   |           |                |
| 16   | Yu C    | Y  | N | N | PY | Y | N | N | PY | Y | N | PY | N | N | N | Y | Y | 5(31.25%) | Critically low |
| 2016 |         |    |   |   |    |   |   |   |    |   |   |    |   |   |   |   |   |           |                |
| 17   | Wang LP | Y  | N | N | PY | N | Y | N | PY | N | N | PY | N | N | N | N | N | 2(12.5)   | Critically low |
| 2006 |         |    |   |   |    |   |   |   |    |   |   |    |   |   |   |   |   |           |                |
| 18   | Li JP   | Y  | N | N | PY | N | Y | N | PY | Y | N | PY | N | N | N | Y | N | 4(25%)    | Critically low |



|                            |                   |                  |           |                  |                   |                   |                  |           |                   |             |                  |                  |                   |                   |                   |                   |   |            |          |
|----------------------------|-------------------|------------------|-----------|------------------|-------------------|-------------------|------------------|-----------|-------------------|-------------|------------------|------------------|-------------------|-------------------|-------------------|-------------------|---|------------|----------|
| 31                         |                   |                  |           |                  |                   |                   |                  |           |                   |             |                  |                  |                   |                   |                   |                   |   | 13(81.25%) | moderate |
| Geegana<br>ge C<br>2012    | Y                 | Y                | N         | Y                | Y                 | Y                 | Y                | PY        | Y                 | N           | Y                | Y                | Y                 | Y                 | Y                 | Y                 | Y |            |          |
| <b>In total of<br/>"Y"</b> | 27<br>(87.1<br>%) | 4<br>(12.9<br>%) | 0<br>(0%) | 4<br>(12.9<br>%) | 21<br>(67.7<br>%) | 25<br>(80.6<br>%) | 4<br>(12.9<br>%) | 0<br>(0%) | 20<br>(64.5<br>%) | 1<br>(3.2%) | 7<br>(22.6<br>%) | 7<br>(22.6<br>%) | 13<br>(41.9<br>%) | 12<br>(38.7<br>%) | 24<br>(77.4<br>%) | 17<br>(54.8<br>%) |   |            |          |

SRs: Systematic reviews; Y: Yes; PY: Partial Yes; N: No; No meta: not conduct meta-analysis

Table 4: PRISMA checklist-2009

| Section/topic       | # | Checklist item                                                                                                                                                                                                                                                                                              |
|---------------------|---|-------------------------------------------------------------------------------------------------------------------------------------------------------------------------------------------------------------------------------------------------------------------------------------------------------------|
| <b>TITLE</b>        |   |                                                                                                                                                                                                                                                                                                             |
| Title               | 1 | Identify the report as a systematic review, meta-analysis, or both.                                                                                                                                                                                                                                         |
| <b>ABSTRACT</b>     |   |                                                                                                                                                                                                                                                                                                             |
| Structured summary  | 2 | Provide a structured summary including, as applicable: background; objectives; data sources; study eligibility criteria, participants, and interventions; study appraisal and synthesis methods; results; limitations; conclusions and implications of key findings; systematic review registration number. |
| <b>INTRODUCTION</b> |   |                                                                                                                                                                                                                                                                                                             |
| Rationale           | 3 | Describe the rationale for the review in the context of what is already known.                                                                                                                                                                                                                              |
| Objectives          | 4 | Provide an explicit statement of questions being addressed with reference to participants, interventions, comparisons, outcomes, and study design (PICOS).                                                                                                                                                  |



| <b>METHODS</b>                     |    |                                                                                                                                                                                                                        |
|------------------------------------|----|------------------------------------------------------------------------------------------------------------------------------------------------------------------------------------------------------------------------|
| Protocol and registration          | 5  | Indicate if a review protocol exists, if and where it can be accessed (e.g., Web address), and, if available, provide registration information including registration number.                                          |
| Eligibility criteria               | 6  | Specify study characteristics (e.g., PICOS, length of follow-up) and report characteristics (e.g., years considered, language, publication status) used as criteria for eligibility, giving rationale.                 |
| Information sources                | 7  | Describe all information sources (e.g., databases with dates of coverage, contact with study authors to identify additional studies) in the search and date last searched.                                             |
| Search                             | 8  | Present full electronic search strategy for at least one database, including any limits used, such that it could be repeated.                                                                                          |
| Study selection                    | 9  | State the process for selecting studies (i.e., screening, eligibility, included in systematic review, and, if applicable, included in the meta-analysis).                                                              |
| Data collection process            | 10 | Describe method of data extraction from reports (e.g., piloted forms, independently, in duplicate) and any processes for obtaining and confirming data from investigators.                                             |
| Data items                         | 11 | List and define all variables for which data were sought (e.g., PICOS, funding sources) and any assumptions and simplifications made.                                                                                  |
| Risk of bias in individual studies | 12 | Describe methods used for assessing risk of bias of individual studies (including specification of whether this was done at the study or outcome level), and how this information is to be used in any data synthesis. |
| Summary measures                   | 13 | State the principal summary measures (e.g., risk ratio, difference in means).                                                                                                                                          |
| Synthesis of results               | 14 | Describe the methods of handling data and combining results of studies, if done, including measures of consistency (e.g., $I^2$ ) for each meta-analysis.                                                              |

| <b>Section/topic</b> | <b>#</b> | <b>Checklist item</b> |
|----------------------|----------|-----------------------|
|----------------------|----------|-----------------------|

|                               |    |                                                                                                                                                                                                          |
|-------------------------------|----|----------------------------------------------------------------------------------------------------------------------------------------------------------------------------------------------------------|
| Risk of bias across studies   | 15 | Specify any assessment of risk of bias that may affect the cumulative evidence (e.g., publication bias, selective reporting within studies).                                                             |
| Additional analyses           | 16 | Describe methods of additional analyses (e.g., sensitivity or subgroup analyses, meta-regression), if done, indicating which were pre-specified.                                                         |
| <b>RESULTS</b>                |    |                                                                                                                                                                                                          |
| Study selection               | 17 | Give numbers of studies screened, assessed for eligibility, and included in the review, with reasons for exclusions at each stage, ideally with a flow diagram.                                          |
| Study characteristics         | 18 | For each study, present characteristics for which data were extracted (e.g., study size, PICOS, follow-up period) and provide the citations.                                                             |
| Risk of bias within studies   | 19 | Present data on risk of bias of each study and, if available, any outcome level assessment (see item 12).                                                                                                |
| Results of individual studies | 20 | For all outcomes considered (benefits or harms), present, for each study: (a) simple summary data for each intervention group (b) effect estimates and confidence intervals, ideally with a forest plot. |
| Synthesis of results          | 21 | Present results of each meta-analysis done, including confidence intervals and measures of consistency.                                                                                                  |
| Risk of bias across studies   | 22 | Present results of any assessment of risk of bias across studies (see Item 15).                                                                                                                          |
| Additional analysis           | 23 | Give results of additional analyses, if done (e.g., sensitivity or subgroup analyses, meta-regression [see Item 16]).                                                                                    |
| <b>DISCUSSION</b>             |    |                                                                                                                                                                                                          |
| Summary of evidence           | 24 | Summarize the main findings including the strength of evidence for each main outcome; consider their relevance to key groups (e.g., healthcare providers, users, and policy makers).                     |
| Limitations                   | 25 | Discuss limitations at study and outcome level (e.g., risk of bias), and at review-level (e.g., incomplete retrieval of identified research, reporting bias).                                            |
| Conclusions                   | 26 | Provide a general interpretation of the results in the context of other evidence, and implications for future research.                                                                                  |
| <b>FUNDING</b>                |    |                                                                                                                                                                                                          |



|          |           |           |           |           |           |           |           |           |           |           |   |
|----------|-----------|-----------|-----------|-----------|-----------|-----------|-----------|-----------|-----------|-----------|---|
| 15       | Y         | N         | N         | Y         | Y         | Y         | Y         | Y         | Y         | Y         | Y |
| 16       | Y         | Y         | N         | Y         | Y         | Y         | N         | N         | Y         | Y         | Y |
| 17       | Y         | Y         | Y         | N         | Y         | Y         | Y         | Y         | Y         | Y         | Y |
| 18       | Y         | Y         | Y         | Y         | Y         | Y         | Y         | Y         | Y         | Y         | Y |
| 19       | Y         | N         | Y         | Y         | N         | N         | N         | N         | Y         | Y         | Y |
| 20       | Y         | Y         | Y         | Y         | Y         | Y         | Y         | Y         | Y         | Y         | Y |
| 21       | Y         | Y         | Y         | Y         | Y         | Y         | Y         | Y         | Y         | Y         | Y |
| 22       | Y         | N         | N         | Y         | Y         | Y         | Y         | Y         | Y         | Y         | Y |
| 23       | N         | N         | Y         | Y         | Y         | Y         | Y         | N         | N         | Y         | Y |
| 24       | Y         | Y         | Y         | Y         | Y         | Y         | Y         | Y         | Y         | Y         | Y |
| 25       | Y         | Y         | Y         | N         | N         | N         | N         | Y         | Y         | N         | N |
| 26       | Y         | Y         | Y         | Y         | Y         | Y         | Y         | Y         | Y         | Y         | Y |
| 27       | Y         | Y         | Y         | N         | N         | Y         | Y         | Y         | Y         | Y         | Y |
| In total |           |           |           |           |           |           |           |           |           |           |   |
| of "Yes" | 24(88.9%) | 18(66.7%) | 25(92.6%) | 20(74.1%) | 22(81.5%) | 25(92.6%) | 20(74.1%) | 18(66.7%) | 25(92.6%) | 23(85.2%) |   |

**SRs**

| Item | 11 Shi L<br>2018 | 12 Xu MH<br>2017 | 13 Li S<br>2011 | 14 Wang C<br>2017 | 15 Tian Y<br>2014 | 16 Yu C<br>2016 | 17 Wang LP<br>2006 | 18 Li JP<br>2016 | 19 Liu H<br>2016 | 20 Huang WX<br>2016 |
|------|------------------|------------------|-----------------|-------------------|-------------------|-----------------|--------------------|------------------|------------------|---------------------|
| 1    | N                | Y                | Y               | Y                 | Y                 | Y               | Y                  | Y                | N                | N                   |
| 2    | Y                | Y                | Y               | Y                 | Y                 | Y               | Y                  | Y                | Y                | Y                   |
| 3    | Y                | Y                | Y               | Y                 | Y                 | Y               | Y                  | Y                | Y                | Y                   |
| 4    | Y                | Y                | Y               | Y                 | Y                 | Y               | Y                  | Y                | Y                | Y                   |
| 5    | N                | N                | N               | N                 | N                 | N               | N                  | N                | N                | N                   |
| 6    | Y                | Y                | Y               | Y                 | Y                 | Y               | Y                  | Y                | Y                | Y                   |
| 7    | Y                | Y                | Y               | Y                 | Y                 | Y               | Y                  | Y                | Y                | Y                   |
| 8    | N                | N                | N               | Y                 | Y                 | N               | Y                  | Y                | Y                | Y                   |



|    |   |   |   |   |   |   |   |   |   |   |   |   |
|----|---|---|---|---|---|---|---|---|---|---|---|---|
| 2  | Y | Y | Y | Y | Y | Y | Y | Y | Y | Y | Y | Y |
| 3  | Y | Y | Y | Y | Y | Y | Y | Y | Y | Y | Y | Y |
| 4  | Y | Y | N | N | N | N | N | N | Y | Y | Y | Y |
| 5  | N | N | N | Y | N | N | Y | Y | Y | Y | Y | Y |
| 6  | Y | Y | Y | Y | Y | Y | Y | Y | Y | Y | Y | Y |
| 7  | Y | Y | Y | Y | Y | Y | Y | Y | Y | Y | Y | Y |
| 8  | N | Y | Y | N | N | N | Y | Y | Y | Y | Y | Y |
| 9  | Y | Y | Y | Y | Y | Y | Y | Y | Y | Y | Y | Y |
| 10 | Y | Y | Y | Y | Y | Y | Y | Y | Y | Y | Y | Y |
| 11 | Y | N | Y | N | Y | Y | Y | Y | Y | Y | Y | Y |
| 12 | Y | Y | Y | Y | Y | Y | Y | Y | Y | Y | Y | Y |
| 13 | Y | Y | Y | N | Y | N | Y | Y | Y | Y | Y | Y |
| 14 | Y | Y | Y | N | Y | N | Y | Y | Y | Y | Y | Y |
| 15 | N | Y | Y | N | Y | N | Y | Y | Y | Y | Y | Y |
| 16 | Y | Y | Y | Y | Y | N | Y | Y | Y | Y | Y | Y |
| 17 | Y | Y | Y | Y | Y | Y | Y | Y | Y | Y | Y | Y |
| 18 | Y | Y | Y | Y | Y | Y | Y | Y | Y | Y | Y | Y |
| 19 | Y | Y | Y | Y | Y | Y | Y | Y | Y | Y | Y | Y |
| 20 | Y | Y | Y | Y | Y | N | Y | Y | Y | Y | Y | Y |
| 21 | Y | Y | Y | Y | Y | N | N | Y | Y | Y | Y | Y |
| 22 | N | Y | Y | N | Y | N | Y | Y | Y | Y | Y | Y |
| 23 | Y | Y | Y | Y | Y | N | N | Y | Y | Y | Y | Y |
| 24 | Y | Y | Y | Y | Y | Y | Y | Y | Y | Y | Y | Y |
| 25 | Y | Y | Y | Y | Y | N | Y | Y | Y | Y | Y | Y |
| 26 | Y | Y | Y | Y | Y | Y | Y | Y | Y | Y | Y | Y |
| 27 | N | N | Y | Y | N | N | N | N | N | N | N | N |

In total 23(85.2%) 24(88.9%) 25(92.6%) 21(77.8%) 14(51.9%) 14(51.9%) 23(85.2%) 25(92.6%) 26(96.3%) 26(96.3%) 26(96.3%)  
of "Yes"

|               | Item of PRISMA |         |         |         |         |        |         |         |         |  |
|---------------|----------------|---------|---------|---------|---------|--------|---------|---------|---------|--|
|               | 1              | 2       | 3       | 4       | 5       | 6      | 7       | 8       | 9       |  |
| In total of   | 28             | 31      | 31      | 25      | 6       | 31     | 31      | 18      | 23      |  |
| "Yes"(31 SRs) | (90.3%)        | (100%)  | (100%)  | (80.6%) | (19.4%) | (100%) | (100%)  | (58%)   | (74.2%) |  |
|               | 10             | 11      | 12      | 13      | 14      | 15     | 16      | 17      | 18      |  |
| In total of   | 27             | 19      | 23      | 28      | 28      | 22     | 23      | 29      | 30      |  |
| "Yes"(31 SRs) | (87.1%)        | (61.3%) | (74.2%) | (90.3%) | (90.3%) | (71%)  | (74.2%) | (93.5%) | (97%)   |  |
|               | 19             | 20      | 21      | 22      | 23      | 24     | 25      | 26      | 27      |  |
| In total of   | 21             | 30      | 29      | 22      | 21      | 31     | 20      | 31      | 14      |  |
| "Yes"(31 SRs) | (67.7%)        | (97%)   | (93.5%) | (71%)   | (67.7%) | (100%) | (64.5%) | (100%)  | (45.2%) |  |

Y:Yes;N:No.
